# Supplementary material
Source: Springer Nature journal article supplement (https://www.springermedizin.de/resource/supplementary/12885_2012_5265_MOESM1_ESM.pdf/9465442)

**Fragment PrVP3 (Full length Apoptin) :a.a 1-121**

a.a.1

a.a. 82

a.a. 88

a.a.111

a.a. 120

a.a. 121

**Fragment A (named PrVP3A1-69N1N2):**

a.a.1

a.a.69

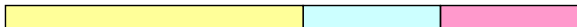

**Fragment B (named PrVP3A1-46N1N2):**

a.a.1

a.a.46

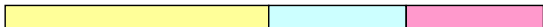

**Fragment C (named PrVP3A1-31N1N2):**

a.a.1

a.a.31

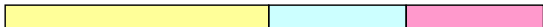

**Fragment D (named PrVP3A32-69N1N2):**

a.a.32

a.a.69

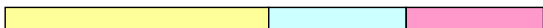

**Fragment E (named PrVP3A32-62N1N2):**

a.a.32

a.a.61

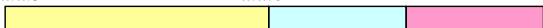

Supplement: MOESM1 [file 9465442]
